# Supplementary material for: MicroRNAs expressed by herpes simplex virus 1 during latent infection regulate viral mRNAs
Source: Springer Nature journal article supplement (doi:10.1038/nature07103), 2008-07-02
Supplement: 41586_2008_BFnature07103_MOESM250_ESM.pdf [file 41586_2008_BFnature07103_MOESM250_ESM.pdf]

## SUPPLEMENTARY INFORMATION

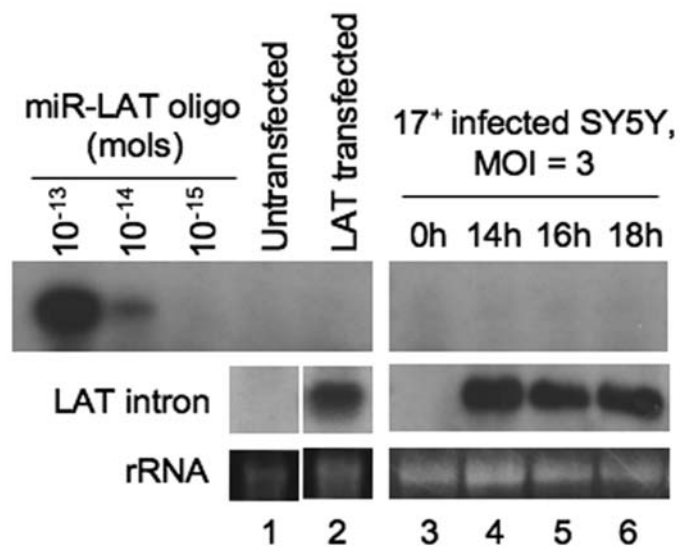

**Suppl Fig. 1.****The proposed miR-LAT miRNA is not detected in HSV-1 infected cells.**

Using splint-ligation, miR-LAT was not detected in SY5Y cells infected with HSV-1 strain 17syn+, (lanes 4 to 6) or in 293T cells transfected with pcDNA3/LAT (lane 2). In contrast, the LAT intron, and a synthetic RNA identical to miR-LAT, were readily detected, in the latter case at a level equivalent to ~300 copies per cell.

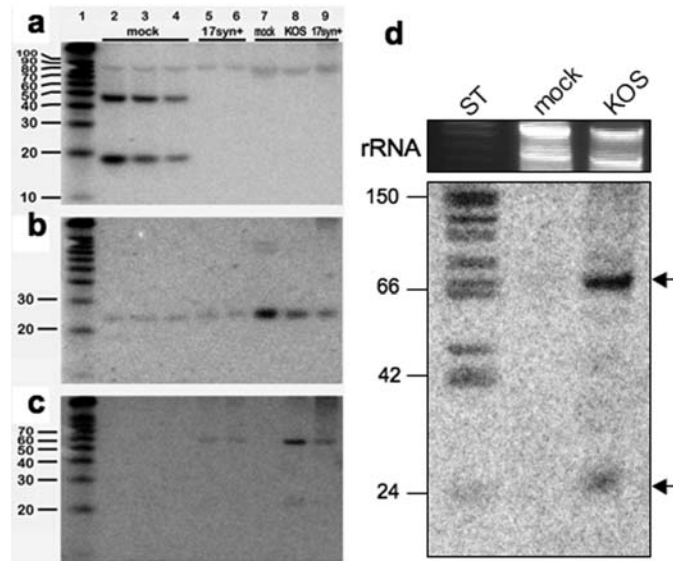

**Suppl Fig. 2.****Northern analysis detects miR-H1 and miR-H6, but not miR-LAT, in HSV-1**

**infected cells.** HSV-1 or mock-infected SY5Y cells were harvested at 16 hr P.I., the time reported by Gupta et al.<sup>19</sup> Short-enriched RNA was isolated using the mirVana™ miRNA Isolation Kit. <sup>32</sup>P-end-labeled probes had specific activities of  $>1 \times 10^8$  cpm/pmol. Synthetic miR-LAT and pre-miR-LAT mimic (3, 1.5, and  $0.75 \times 10^{10}$  molecules, lanes 2, 3, 4) were combined with cellular RNA. **a.** Probed with a miR-LAT probe (5'-GGGCCCGGGCCGGCCGCCACG-3'). **b.** Same blot as in panel **a**, stripped and re-probed for cellular let-7a. **c.** Parallel blot re-probed with miR-H1 after having been probed with the miR-LAT probe, then stripped. **d.** Northern blot for HSV-1 miR-H6 in infected Vero cells. Arrows indicate pre-miR-H6 and mature miR-H6. rRNA served as a loading control. Numbers indicate size markers.

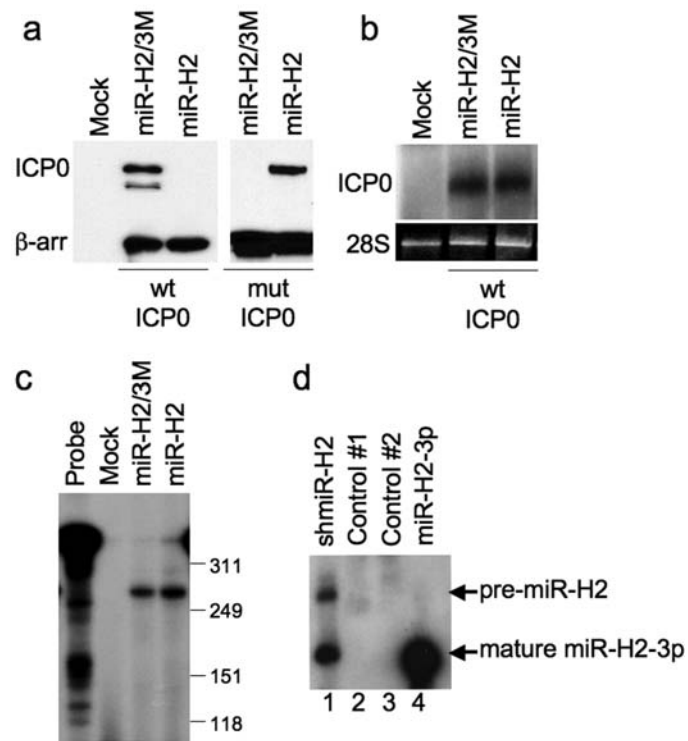

**Suppl Fig. 3.****miR-H2-3p inhibits ICP0 protein expression but does not affect ICP0 mRNA**

**levels. a.** 293T cells were co-transfected with a  $\beta$ -arrestin expression plasmid and a wildtype or mutant ICP0 expression construct (Fig. 3a), as well as either miR-H2 or miR-H2/3M synthetic pre-miRNA duplex intermediates. ICP0 and  $\beta$ -arrestin expression were assayed by Western blot. **b.** Northern analysis of ICP0 mRNA levels in samples shown in panel A that were transfected with wildtype ICP0. 28S rRNA was used as a loading control. **c.** RPA for ICP0 mRNA levels, and potential miR-H2-3p-induced mRNA cleavage products. miRNA cleavage of the ICP0 mRNA would result in the generation of 120 nt and 164 nt probe fragments, while full-length ICP0 mRNA should rescue a 284 nt probe fragment. **d.** Northern analysis of 293T cells transfected with pSuper-based expression plasmids designed to express an shRNA that mimics pre-miR-H2 (lane 1) or two irrelevant shRNAs (lanes 2 and 3). Synthetic mature miR-H2 was used as a positive control (lane 4).

**Supplementary Table 1**  
**Short RNA sequence analysis**

|                                             | <u>293/LAT</u> |      | <u>TG/HSV-1</u> |      |
|---------------------------------------------|----------------|------|-----------------|------|
| Total reads                                 | 225,439        |      | 254,651         |      |
| Num. of unique sequences                    | 23,683         |      | 28,152          |      |
| <b>Total num. of sequences 18-24nts</b>     | 192,864        | 86%  | 235,114         | 92%  |
| <b>Num. of unique sequences 18-24nts</b>    | 11,398         |      | 15,315          |      |
| <hr/>                                       |                |      |                 |      |
| Total num. of sequences $\geq 2$ hits       | 185,204        | 82%  | 224,729         | 88%  |
| Num. of unique sequences $\geq 2$ hits      | 3,738          |      | 4,930           |      |
| <hr/>                                       |                |      |                 |      |
| Total num. of cellular miRNAs $\geq 2$ hits | 144,955        | 64%  | 204,867         | 80%  |
| Num. of HSV-1 miRNAs $\geq 2$ hits          | 619            | 0.3% | 144             | 0.1% |
| <hr/>                                       |                |      |                 |      |
| Single hit HSV-1 sequences                  | 67             |      | 27              |      |
| Alternative variants of miR-H2 to miR-H6    | 32             |      | 20              |      |
| Other short RNAs of HSV-1 origin            | 35             |      | 7               |      |
| <hr/>                                       |                |      |                 |      |
| <b>Total num. of HSV-1 miRNAs</b>           | 651            | 0.3% | 164             | 0.1% |

**Suppl Table 1**

**Short RNA sequence analysis.** Overall summary of 454 sequencing data of 18-24 bp cDNAs obtained from pcDNA3/LAT-transfected 293T cells and mouse TG latently infected with HSV-1. The central section summarizes the characteristics of cDNA sequences obtained two or more times, while the lower section describes HSV-1 sequences obtained only once in this analysis.



**Supplementary Table 2A**  
**Identity of cellular miRNAs detected by sequence analysis**

|                 |       |                |       |                 |               |
|-----------------|-------|----------------|-------|-----------------|---------------|
| hsa-miR-19b     | 24406 | hsa-miR-193b   | 3     | hsa-miR-361-5p  | 2             |
| hsa-let-7a      | 570   | hsa-miR-194    | 63    | hsa-miR-374a    | 4             |
| hsa-let-7b      | 99    | hsa-miR-195    | 48    | hsa-miR-374b    | 12            |
| hsa-let-7c      | 141   | hsa-miR-196a   | 334   | hsa-miR-378     | 4             |
| hsa-let-7d      | 16    | hsa-miR-196b   | 144   | hsa-miR-421     | 16            |
| hsa-let-7e      | 36    | hsa-miR-197    | 63    | hsa-miR-423-3p  | 2             |
| hsa-let-7f      | 189   | hsa-miR-19a    | 2675  | hsa-miR-424     | 178           |
| hsa-let-7g      | 109   | hsa-miR-19b    | 4450  | hsa-miR-425     | 25            |
| hsa-let-7i      | 98    | hsa-miR-200c   | 3     | hsa-miR-454     | 18            |
| hsa-miR-101     | 8     | hsa-miR-20a    | 3153  | hsa-miR-455-3p  | 27            |
| hsa-miR-103     | 434   | hsa-miR-20b    | 44    | hsa-miR-484     | 349           |
| hsa-miR-106a    | 686   | hsa-miR-21     | 599   | hsa-miR-486-3p  | 14            |
| hsa-miR-106b    | 149   | hsa-miR-210    | 61    | hsa-miR-486-5p  | 129           |
| hsa-miR-107     | 317   | hsa-miR-218    | 452   | hsa-miR-497     | 17            |
| hsa-miR-10a     | 731   | hsa-miR-221    | 16068 | hsa-miR-503     | 143           |
| hsa-miR-10b     | 237   | hsa-miR-222    | 1717  | hsa-miR-505     | 20            |
| hsa-miR-124     | 21    | hsa-miR-224    | 4     | hsa-miR-532-3p  | 91            |
| hsa-miR-125a-5p | 250   | hsa-miR-23a    | 12    | hsa-miR-532-5p  | 38            |
| hsa-miR-125b    | 216   | hsa-miR-23b    | 21    | hsa-miR-542-5p  | 14            |
| hsa-miR-126     | 9     | hsa-miR-24     | 51    | hsa-miR-548b-3p | 62            |
| hsa-miR-127-3p  | 3     | hsa-miR-25     | 7992  | hsa-miR-548d-5p | 2             |
| hsa-miR-128b    | 82    | hsa-miR-26a    | 67    | hsa-miR-551a    | 3             |
| hsa-miR-130b    | 562   | hsa-miR-26b    | 100   | hsa-miR-551b    | 83            |
| hsa-miR-132     | 2     | hsa-miR-27a    | 178   | hsa-miR-574-3p  | 72            |
| hsa-miR-133a    | 2     | hsa-miR-27b    | 477   | hsa-miR-589     | 3             |
| hsa-miR-138     | 47    | hsa-miR-28-3p  | 16    | hsa-miR-598     | 41            |
| hsa-miR-139-5p  | 2     | hsa-miR-29a    | 15    | hsa-miR-615-3p  | 34            |
| hsa-miR-140-3p  | 479   | hsa-miR-29b    | 53    | hsa-miR-628-3p  | 2             |
| hsa-miR-140-5p  | 2     | hsa-miR-29c    | 16    | hsa-miR-660     | 102           |
| hsa-miR-142-3p  | 8     | hsa-miR-301a   | 18    | hsa-miR-675     | 15            |
| hsa-miR-146b-5p | 2     | hsa-miR-301b   | 10    | hsa-miR-7       | 21            |
| hsa-miR-148b    | 6     | hsa-miR-30a    | 79    | hsa-miR-708     | 10            |
| hsa-miR-149     | 10    | hsa-miR-30b    | 1639  | hsa-miR-744     | 69            |
| hsa-miR-151-3p  | 23    | hsa-miR-30c    | 764   | hsa-miR-760     | 2             |
| hsa-miR-151-5p  | 58    | hsa-miR-30d    | 95    | hsa-miR-767-5p  | 22            |
| hsa-miR-152     | 7     | hsa-miR-30e    | 11    | hsa-miR-877     | 2             |
| hsa-miR-15a     | 713   | hsa-miR-31     | 107   | hsa-miR-891a    | 20            |
| hsa-miR-15b     | 6007  | hsa-miR-32     | 18    | hsa-miR-92a     | 5766          |
| hsa-miR-16      | 14523 | hsa-miR-320    | 6     | hsa-miR-92b     | 109           |
| hsa-miR-17      | 14777 | hsa-miR-324-3p | 86    | hsa-miR-93      | 9504          |
| hsa-miR-181a    | 35    | hsa-miR-324-5p | 34    | hsa-miR-935     | 8             |
| hsa-miR-181b    | 18    | hsa-miR-328    | 3     | hsa-miR-940     | 2             |
| hsa-miR-181d    | 2     | hsa-miR-330-3p | 2     | hsa-miR-941     | 53            |
| hsa-miR-185     | 76    | hsa-miR-331-3p | 37    | hsa-miR-98      | 3             |
| hsa-miR-187     | 79    | hsa-miR-338-3p | 12    | hsa-miR-99a     | 118           |
| hsa-miR-188-3p  | 6     | hsa-miR-339-5p | 22    | hsa-miR-99b     | 10361         |
| hsa-miR-188-5p  | 2     | hsa-miR-340    | 2     | <b>Total</b>    | <b>144955</b> |
| hsa-miR-18a     | 2069  | hsa-miR-342-3p | 528   |                 |               |
| hsa-miR-18b     | 37    | hsa-miR-346    | 4     |                 |               |
| hsa-miR-191     | 463   | hsa-miR-34a    | 6049  |                 |               |
| hsa-miR-192     | 119   | hsa-miR-361-3p | 15    |                 |               |

**Supplementary Table 2B**  
**Identity of cellular miRNAs detected by sequence analysis**

|                 |       |                 |      |                 |       |                |               |
|-----------------|-------|-----------------|------|-----------------|-------|----------------|---------------|
| mmu-miR-34a     | 25463 | mmu-miR-181a    | 187  | mmu-miR-324-3p  | 4     | mmu-miR-666-3p | 32            |
| mmu-let-7a      | 2272  | mmu-miR-181b    | 36   | mmu-miR-324-5p  | 127   | mmu-miR-666-5p | 3             |
| mmu-let-7b      | 18414 | mmu-miR-181c    | 2    | mmu-miR-326     | 120   | mmu-miR-667    | 46            |
| mmu-let-7c      | 21409 | mmu-miR-182     | 21   | mmu-miR-328     | 223   | mmu-miR-669b   | 11            |
| mmu-let-7d      | 325   | mmu-miR-183     | 14   | mmu-miR-329     | 2     | mmu-miR-672    | 16            |
| mmu-let-7e      | 392   | mmu-miR-185     | 267  | mmu-miR-331-3p  | 34    | mmu-miR-674    | 527           |
| mmu-let-7f      | 1451  | mmu-miR-187     | 55   | mmu-miR-335-5p  | 2     | mmu-miR-676    | 1151          |
| mmu-let-7g      | 981   | mmu-miR-188-3p  | 8    | mmu-miR-337-5p  | 41    | mmu-miR-700    | 22            |
| mmu-let-7i      | 4623  | mmu-miR-191     | 120  | mmu-miR-338-3p  | 10174 | mmu-miR-744    | 425           |
| mmu-miR-1       | 11    | mmu-miR-192     | 32   | mmu-miR-338-5p  | 24    | mmu-miR-760    | 2             |
| mmu-miR-100     | 95    | mmu-miR-194     | 98   | mmu-miR-341     | 478   | mmu-miR-770-3p | 2             |
| mmu-miR-101a    | 23    | mmu-miR-195     | 500  | mmu-miR-342-3p  | 38    | mmu-miR-770-5p | 2             |
| mmu-miR-101b    | 8     | mmu-miR-199a-5p | 34   | mmu-miR-344     | 5     | mmu-miR-7a     | 28            |
| mmu-miR-103     | 381   | mmu-miR-199b    | 1381 | mmu-miR-345-3p  | 5     | mmu-miR-7b     | 2             |
| mmu-miR-106a    | 25    | mmu-miR-19b     | 27   | mmu-miR-345-5p  | 32    | mmu-miR-92a    | 21            |
| mmu-miR-106b    | 2     | mmu-miR-200a    | 16   | mmu-miR-34a     | 10468 | mmu-miR-92b    | 5             |
| mmu-miR-107     | 72    | mmu-miR-200b    | 27   | mmu-miR-34c     | 15    | mmu-miR-93     | 573           |
| mmu-miR-124     | 4053  | mmu-miR-200c    | 8    | mmu-miR-350     | 5     | mmu-miR-96     | 6             |
| mmu-miR-125a-5p | 256   | mmu-miR-204     | 3    | mmu-miR-351     | 34    | mmu-miR-98     | 96            |
| mmu-miR-125b-3p | 21    | mmu-miR-206     | 3    | mmu-miR-370     | 4     | mmu-miR-99a    | 532           |
| mmu-miR-125b-5p | 25332 | mmu-miR-20b     | 29   | mmu-miR-376a    | 4     | mmu-miR-99b    | 30961         |
| mmu-miR-126-3p  | 763   | mmu-miR-21      | 5724 | mmu-miR-378     | 2     | <b>Total</b>   | <b>204867</b> |
| mmu-miR-126-5p  | 9     | mmu-miR-210     | 1200 | mmu-miR-379     | 13    |                |               |
| mmu-miR-127     | 3407  | mmu-miR-214     | 301  | mmu-miR-383     | 196   |                |               |
| mmu-miR-130a    | 252   | mmu-miR-217     | 15   | mmu-miR-423-3p  | 2     |                |               |
| mmu-miR-130b    | 11    | mmu-miR-218     | 14   | mmu-miR-431     | 84    |                |               |
| mmu-miR-134     | 7     | mmu-miR-221     | 60   | mmu-miR-433     | 2     |                |               |
| mmu-miR-136     | 6     | mmu-miR-222     | 37   | mmu-miR-434-5p  | 4     |                |               |
| mmu-miR-138     | 10140 | mmu-miR-23a     | 17   | mmu-miR-449a    | 11    |                |               |
| mmu-miR-139-3p  | 18    | mmu-miR-23b     | 32   | mmu-miR-451     | 6     |                |               |
| mmu-miR-139-5p  | 64    | mmu-miR-24      | 1223 | mmu-miR-455     | 163   |                |               |
| mmu-miR-140     | 19    | mmu-miR-25      | 161  | mmu-miR-466b-5p | 2     |                |               |
| mmu-miR-141     | 2     | mmu-miR-26a     | 2    | mmu-miR-466c-5p | 6     |                |               |
| mmu-miR-142-3p  | 136   | mmu-miR-26b     | 2    | mmu-miR-466f-5p | 9     |                |               |
| mmu-miR-142-5p  | 10    | mmu-miR-27a     | 433  | mmu-miR-466h    | 23    |                |               |
| mmu-miR-143     | 760   | mmu-miR-27b     | 412  | mmu-miR-484     | 57    |                |               |
| mmu-miR-144     | 14    | mmu-miR-299     | 2    | mmu-miR-485     | 2     |                |               |
| mmu-miR-146a    | 2     | mmu-miR-29a     | 256  | mmu-miR-486     | 275   |                |               |
| mmu-miR-146b    | 8     | mmu-miR-29b     | 57   | mmu-miR-497     | 1753  |                |               |
| mmu-miR-147     | 2     | mmu-miR-29c     | 27   | mmu-miR-503     | 29    |                |               |
| mmu-miR-148b    | 5     | mmu-miR-300     | 111  | mmu-miR-511     | 3     |                |               |
| mmu-miR-149     | 30    | mmu-miR-301a    | 21   | mmu-miR-532-3p  | 48    |                |               |
| mmu-miR-150     | 32    | mmu-miR-30a     | 100  | mmu-miR-532-5p  | 24    |                |               |
| mmu-miR-151-3p  | 4     | mmu-miR-30b     | 458  | mmu-miR-540-3p  | 13    |                |               |
| mmu-miR-151-5p  | 97    | mmu-miR-30c     | 602  | mmu-miR-540-5p  | 4     |                |               |
| mmu-miR-152     | 290   | mmu-miR-30d     | 142  | mmu-miR-542-5p  | 3     |                |               |
| mmu-miR-154     | 5     | mmu-miR-30e     | 33   | mmu-miR-551b    | 63    |                |               |
| mmu-miR-15a     | 830   | mmu-miR-31      | 22   | mmu-miR-574-3p  | 2656  |                |               |
| mmu-miR-15b     | 424   | mmu-miR-32      | 4    | mmu-miR-574-5p  | 3     |                |               |
| mmu-miR-16      | 5680  | mmu-miR-322     | 42   | mmu-miR-592     | 2     |                |               |
| mmu-miR-17      | 81    | mmu-miR-323-3p  | 9    | mmu-miR-665     | 3     |                |               |

**Suppl Table 2**

**Identity of cellular miRNAs detected by sequence analysis.** Mature cellular miRNAs obtained from 454 sequencing, as identified by miRBASE. **A.** pcDNA3/LAT transfected 293T cells. hsa; human. **B.** Mouse TG latently infected with HSV-1. mmu; mouse.

## Supplementary Table 3

## HSV-1 miRNAs identified by 454 sequencing of cDNAs from pcDNA3/LAT transfected 293T cells

|       | Freq | Sequences                | Nts | Start  | End    | Orientation | Designation |
|-------|------|--------------------------|-----|--------|--------|-------------|-------------|
|       | 7    | TCGCACGCGCCCGGCACAGACT   | 22  | 121832 | 121853 | +           | miR-H2-5p   |
|       | 2    | TCGCACGCGCCCGGCACAGA     | 20  | 121832 | 121851 |             |             |
| Total | 9    |                          |     |        |        |             |             |
|       | 113  | CCTGAGCCAGGGACGAGTGCGA   | 22  | 121871 | 121892 | +           | miR-H2-3p   |
|       | 89   | CCTGAGCCAGGGACGAGTGCGACT | 24  | 121871 | 121894 |             |             |
|       | 27   | CCTGAGCCAGGGACGAGTGCGAC  | 23  | 121871 | 121893 |             |             |
|       | 10   | CCTGAGCCAGGGACGAGTGCG    | 21  | 121871 | 121891 |             |             |
|       | 4    | CCTGAGCCAGGGACGAGTGCGACa | 24  | 121871 | 121893 |             |             |
|       | 4    | TGAGCCAGGGACGAGTGCGACTGa | 24  | 121873 | 121895 |             |             |
|       | 3    | TGAGCCAGGGACGAGTGCGA     | 20  | 121873 | 121892 |             |             |
|       | 2    | CCTGAGCCAGGGACGAGTGCGAt  | 23  | 121871 | 121892 |             |             |
|       | 2    | GAGCCAGGGACGAGTGCGACTGt  | 23  | 121874 | 121895 |             |             |
|       | 2    | CTGAGCCAGGGACGAGTGCGA    | 21  | 121872 | 121892 |             |             |
|       | 2    | CCTGAGCCAGGGACGAGT       | 18  | 121871 | 121888 |             |             |
| Total | 258  |                          |     |        |        |             |             |
|       | 3    | CTGGGACTGTGCGGTTGGGA     | 20  | 125775 | 125794 | +           | miR-H3      |
|       | 2    | CTGGGACTGTGCGGTTGGGAC    | 21  | 125775 | 125795 |             |             |
| Total | 5    |                          |     |        |        |             |             |
|       | 25   | GGTAGAGTTTGACAGGCAAGC    | 21  | 125882 | 125902 | +           | miR-H4-5p   |
|       | 11   | GGTAGAGTTTGACAGGCAAGCA   | 22  | 125882 | 125903 |             |             |
|       | 11   | GTAGAGTTTGACAGGCAAGCA    | 21  | 125883 | 125903 |             |             |
|       | 4    | GTAGAGTTTGACAGGCAAGC     | 20  | 125883 | 125902 |             |             |
|       | 2    | GGTAGAGTTTGACAGGCAAGCa   | 23  | 125882 | 125903 |             |             |
| Total | 53   |                          |     |        |        |             |             |
|       | 219  | CTTGCCCTGTCTAACTCGCTAGT  | 22  | 125927 | 125948 | +           | miR-H4-3p   |
|       | 12   | CTTGCCCTGTCTAACTCGCTAG   | 21  | 125927 | 125947 |             |             |
|       | 9    | TTGCCTGTCTAACTCGCTAGT    | 21  | 125928 | 125948 |             |             |
|       | 6    | CTTGCCCTGTCTAACTCGCTA    | 20  | 125927 | 125946 |             |             |
|       | 3    | CTTGCCCTGTCTAACTCGCT     | 19  | 125927 | 125945 |             |             |
|       | 2    | CTTGCCCTGTCTAACTCGCTAGTa | 23  | 125927 | 125948 |             |             |
|       | 2    | CTTGCCCTGTCTAACTCGCTAGTt | 23  | 125927 | 125948 |             |             |
|       | 2    | CTTaGCCTGTCTAACTCGCTAGT  | 23  | 125930 | 125948 |             |             |
| Total | 255  |                          |     |        |        |             |             |
|       | 29   | GTCAGAGATCCAAACCCTCCGGt  | 23  | 126769 | 126790 | +           | miR-H5      |
|       | 5    | GTCAGAGATCCAAACCCTCCGGtt | 24  | 126769 | 126790 |             |             |
|       | 5    | TCAGAGATCCAAACCCTCCGGt   | 22  | 126770 | 126790 |             |             |
| Total | 39   |                          |     |        |        |             |             |
| TOTAL | 619  |                          |     |        |        |             |             |

**Suppl Table 3****HSV-1 miRNAs identified by 454 sequencing of cDNAs from**

**pcDNA3/LAT-transfected 293T cells.** Sequence start and end coordinates are as aligned with the HSV-1 strain 17 genome sequence (NC\_001806). As a consequence of being located within LAT, which itself is contained within a repeat region, there are two inverted copies of each HSV-1 miRNA in the viral genome (Fig. 1a). Coordinates and orientations provided are in relation to the positively orientated LAT. Lower case letters indicate nucleotides that do not match the genome sequence and are presumably artifacts generated by the cDNA cloning process. Only HSV-1 sequences recovered at least twice are included in this table. No evidence of RNA editing of HSV-1 miRNAs was noted.

**Supplementary Table 4**  
**HSV-1 miRNAs identified by 454 sequencing of cDNAs from latently infected mouse trigeminal ganglia**

| Freq         | Sequences                | Nts | Start  | End    | Orientation | Designation |
|--------------|--------------------------|-----|--------|--------|-------------|-------------|
| 20           | CCTGAGCCAGGGACGAGTGCGA   | 22  | 121871 | 121892 | +           | miR-H2-3p   |
| 20           | GAGCCAGGGACGAGTGCGACTGt  | 23  | 121874 | 121895 |             |             |
| 10           | CCTGAGCCAGGGACGAGTGCGACT | 24  | 121871 | 121894 |             |             |
| 5            | CCTGgGCCAGGGACGAGTGCGA   | 22  | 121871 | 121892 |             |             |
| 4            | TGAGCCAGGGACGAGTGCGACTGt | 24  | 121873 | 121895 |             |             |
| 3            | cGAGCCAGGGACGAGTGCGACTGt | 24  | 121874 | 121895 |             |             |
| 3            | GAGCCAGGGACGAGTGCGACTGc  | 23  | 121874 | 121895 |             |             |
| 3            | CCTGAGCCAGGGACGAGTGCGAC  | 23  | 121871 | 121893 |             |             |
| 3            | TGAGCCAGGGACGAGTGCGACTG  | 23  | 121873 | 121895 |             |             |
| 3            | TGAGCCAGGGACGAGTGCGACT   | 22  | 121873 | 121894 |             |             |
| 2            | CCTGAGCCAGGGACGAGTGCGACa | 24  | 121871 | 121893 |             |             |
| 2            | CTGAGCCAGGGACGAGTGCGACT  | 23  | 121872 | 121894 |             |             |
| 2            | GAGCCAGGGACGAGTGCGACTG   | 22  | 121874 | 121895 |             |             |
| 2            | TGAGCCAGGGACGAGTGCGA     | 20  | 121873 | 121892 |             |             |
| 2            | CgGGGACGAGTGCGACTGt      | 19  | 121880 | 121895 |             |             |
| <b>Total</b> | <b>84</b>                |     |        |        |             |             |
| 10           | CTGGGACTGTGCGGTTGGGA     | 20  | 125775 | 125794 | +           | miR-H3      |
| 2            | CaGGGACTGTGCGGTTGGGA     | 20  | 125777 | 125794 |             |             |
| 2            | CTGGGACTGTGCGGTTGGA      | 19  | 125775 | 125792 |             |             |
| <b>Total</b> | <b>14</b>                |     |        |        |             |             |
| 25           | CACTTCCCGTCCTTCCATCCC    | 21  | 118348 | 118328 | -           | miR-H6      |
| 11           | CACTTCCCGTCCTTCCATCCCa   | 22  | 118348 | 118328 |             |             |
| 6            | CACTTCCCGTCCTTCCATCC     | 20  | 118348 | 118329 |             |             |
| 2            | CACTTCCCGTCCTTCCATCCCC   | 22  | 118348 | 118327 |             |             |
| 2            | CACTTCCCGTCCTTCCATCCct   | 22  | 118348 | 118328 |             |             |
| <b>Total</b> | <b>46</b>                |     |        |        |             |             |
| <b>TOTAL</b> | <b>144</b>               |     |        |        |             |             |

**Suppl Table 4**

**HSV-1 miRNAs identified through 454 sequencing of cDNAs from latently infected mouse TG.** Sequence start and end coordinates are as aligned with the HSV-1 strain 17 genome sequence (NC\_001806). As a consequence of being located within LAT, which itself is contained within a repeat region, there are two inverted copies of each HSV-1 miRNA in the genome (Fig. 1a). Coordinates and orientation provided are in relation to the positively orientated LAT. Lower case letters indicate nucleotides that do not match the genome sequence and are presumably cloning artifacts. Only HSV-1 sequences recovered at least twice are included in this table. No evidence of RNA editing of HSV-1 miRNAs was noted.

**Supplementary Table 5A**  
**Stem-loop RT PCR Analysis of HSV-1 microRNAs**

|                           | Log <sub>10</sub> copies per ng short-enriched RNA |        |           |        |           |           |        |        |
|---------------------------|----------------------------------------------------|--------|-----------|--------|-----------|-----------|--------|--------|
|                           | let-7a                                             | miR-H1 | miR-H2-3p | miR-H3 | miR-H4-3p | miR-H4-5p | miR-H5 | miR-H6 |
| LAT/293T                  | 6.7                                                | Nt     | 5.2       | 5.1    | 6.6       | 6.0       | 5.8    | 2.3    |
| 293T control              | 6.7                                                | Nt     | 1.9       | 1.2    | 2.3       | 1.8       | 1.9    | 2.3    |
| Latently-infected ganglia | 6.8                                                | Nt     | 3.7       | 2.8    | 4.8       | 3.4       | 3.8    | 3.5    |
| Mock-infected ganglia     | 6.8                                                | Nt     | 1.8       | 1.8    | 3.2       | 1.9       | 2.3    | 1.7    |
| HSV-1-infected Vero       | 6.1                                                | 5.6    | 4.1       | 2.7    | 3.8       | 3.1       | 3.3    | 5.0    |
| Mock-infected Vero        | 6.1                                                | 2.0    | 0.7       | 0.1    | -0.5      | -0.4      | 1.3    | 1.5    |



**Supplementary Table 5B**  
**Oligonucleotides used for stem-loop RT PCR quantification of microRNAs**

| miRNA  | Reagent        | Length | Sequence                                            |
|--------|----------------|--------|-----------------------------------------------------|
| all    | Reverse Primer | 20     | CCAGTGCAGGGTCCGAGGTA                                |
| let-7a | RNA Standard   | 22     | UGAGGUAGUAGGUUGUAUAGUU                              |
| let-7a | RT-loop        | 50     | GTCGTATCCAGTGCAGGGTCCGAGGTATTCGCACTGGATACGACAACCTAT |
| let-7a | Forward Primer | 22     | GCCCGGTGAGGTAGTGGGTTGT                              |
| let-7a | Probe          | 17     | (6FAM) CTGGATACGACAACCTAT(MGB)                      |
| H1     | RNA Standard   | 21     | UGGAAGGACGGGAAGUGGAAG                               |
| H1     | RT-loop        | 50     | GTCGTATCCAGTGCAGGGTCCGAGGTATTCGCACTGGATACGACCTTCCA  |
| H1     | Forward Primer | 19     | CACGCATGGAAGGACGGGA                                 |
| H1     | Probe          | 18     | (6-FAM) TGGATACGACCTTCCACT (MGB)                    |
| H2-3p  | RNA Standard   | 24     | CCUGAGCCAGGGACGAGUGCGACU                            |
| H2-3p  | RT-loop        | 50     | GTCGTATCCAGTGCAGGGTCCGAGGTATTCGCACTGGATACGACAGTCGC  |
| H2-3p  | Forward Primer | 22     | TCATAACCTGAGCCAGGGACGA                              |
| H2-3p  | Probe          | 18     | (6-FAM) TACGACAGTCGCACT (MGB)                       |
| H3     | RNA Standard   | 20     | CUGGGACUGUGCGGUUGGGA                                |
| H3     | RT-loop        | 50     | GTCGTATCCAGTGCAGGGTCCGAGGTATTCGCACTGGATACGACTCCCAA  |
| H3     | Forward Primer | 18     | GCTTGGCTGGGACTGTGC                                  |
| H3     | Probe          | 18     | (6-FAM) TACGACTCCCAACCGCAC (MGB)                    |
| H4-3p  | RNA Standard   | 22     | CUUGCCUGUCUAACUCGCUAGU                              |
| H4-3p  | RT-loop        | 50     | GTCGTATCCAGTGCAGGGTCCGAGGTATTCGCACTGGATACGACACTAGC  |
| H4-3p  | Forward Primer | 20     | GCCTGGCTTGCCTGTCTAAC                                |
| H4-3p  | Probe          | 18     | (6-FAM) CTGGATACGACACTAGCG (MGB)                    |
| H4-5p  | RNA Standard   | 21     | GGUAGAGUUUGACAGGCAAGC                               |
| H4-5p  | RT-loop        | 50     | GTCGTATCCAGTGCAGGGTCCGAGGTATTCGCACTGGATACGACGCTTGC  |
| H4-5p  | Forward Primer | 21     | GCCCGGGGTAGAGTTTGACAG                               |
| H4-5p  | Probe          | 17     | (6-FAM) CTGGATACGACGCTTGC (MGB)                     |
| H5     | RNA Standard   | 23     | GUCAGAGAUCCAAACCCUCCGGU                             |
| H5     | RT-loop        | 50     | GTCGTATCCAGTGCAGGGTCCGAGGTATTCGCACTGGATACGACACCGGA  |
| H5     | Forward Primer | 22     | GCCTGGGTCAGAGATCCAAACC                              |
| H5     | Probe          | 18     | (6-FAM) CTGGATACGACACCGGAG (MGB)                    |
| H6     | RNA Standard   | 22     | CACUUCCCGUCCUCCAUCCCC                               |
| H6     | RT-loop        | 50     | GTCGTATCCAGTGCAGGGTCCGAGGTATTCGCACTGGATACGACGGGGAT  |
| H6     | Forward Primer | 22     | TCATAACACTTCCCGTCCTTCC                              |
| H6     | Probe          | 18     | (6FAM) GGATACGACGGGGATGGA (MGB)                     |

**Suppl Table 5**

**Validation of HSV-1 miRNAs by quantitative stem-loop RT-PCR.** Stem-loop RT-PCR assays were designed for each HSV-1 miRNA and for cellular miRNA let-7a, and developed using synthetic miRNAs, which were used as quantification standards. **A.** Representative results, shown as log miRNA copies per ng short-enriched RNA, are shown for RNA isolated from 293T cells transfected with pcDNA3/LAT, latently-infected mouse TG, and Vero cells infected with HSV-1 at 16 hours post-infection. Each assay included reactions lacking reverse-transcriptase (RT) or the RT primer, and mixtures of synthetic miRNAs other than those being assayed, as well as RNA from non-transfected 293T or Vero cells, or mock-infected ganglia, as negative controls. Background levels, which are equivalent to the highest values obtained from these negative controls, are presented in italics. Nt, not tested. **B.** Reagents for each stem-loop RT PCR assay. The sequences of the RNA standards and the RT and PCR primers are derived from the data in Supplementary Tables 3 and 4 for HSV-1, and from Chen et al.<sup>37</sup> for let-7a. FAM, TaqMan fluorescent probe; MGB, minor groove binder.

**Supplementary Table 6****A** Molecules per 30 pg total RNA = molecules/cell

|           | let-7a | H1    | H2-3p | H3  | H4-3p  | H4-5p | H5    | H6  |
|-----------|--------|-------|-------|-----|--------|-------|-------|-----|
| 293T tx   | 15,000 | Nt    | 480   | 390 | 12,000 | 3,000 | 1,890 | ≤1  |
| 293T mock | 15,000 | Nt    | 0     | 0   | ≤1     | 0     | 0     | ≤1  |
| Latent TG | 18,900 | Nt    | 15    | 2   | 189    | 8     | 19    | 10  |
| TG mock   | 18,900 | Nt    | 0     | 0   | ≤5     | 0     | ≤1    | 0   |
| Inf Vero  | 3,900  | 1,200 | 38    | 2   | 19     | 4     | 6     | 300 |
| Mock Vero | 3,900  | 0     | 0     | 0   | 0      | 0     | 0     | 0   |

**B** Molecules/cell x  $2 \times 10^6$  cells = molecules/TG

| let-7a               | H1 | H2-3p             | H3                | H4-3p           | H4-5p             | H5                | H6                |
|----------------------|----|-------------------|-------------------|-----------------|-------------------|-------------------|-------------------|
| $3.2 \times 10^{10}$ | -  | $3.2 \times 10^7$ | $4.0 \times 10^6$ | $4 \times 10^8$ | $1.6 \times 10^7$ | $4.0 \times 10^7$ | $2.0 \times 10^7$ |

**C** Molecules/500 LAT<sup>+</sup> neurons in each TG = molecules/LAT<sup>+</sup> neuron

| let-7a | H1 | H2     | H3    | H4-3p   | H4-5p  | H5     | H6     |
|--------|----|--------|-------|---------|--------|--------|--------|
| 18,900 | -  | 63,000 | 8,000 | 800,000 | 32,000 | 80,000 | 40,000 |

**Suppl Table 6****Estimation of HSV-1 miRNA expression levels in latently or productively**

**infected cells. A.** Estimation of miRNA molecules per cell. We found that short-enriched RNA comprised roughly 10% of total RNA. Mammalian cells contain around 30 pg of total RNA per cell, so molecules/cell equals molecules per ng of short enriched RNA multiplied by 0.003. **B.** Estimation of miRNA molecules per ganglion. To estimate the number of miRNA molecules per ganglion, we assumed a constant  $2 \times 10^6$  cells per TG based on measurement of how many copies of a murine single-copy gene, adipsin, could be detected per TG using qRT-PCR (unpublished results). **C.** Estimation of miRNA molecules per latently infected ganglionic neuron. Most TG cells do not harbor latent HSV-1. In mice infected with HSV-1 strain syn17+, the number of TG neurons containing HSV-1 DNA has been shown to range from <240 to ~7200 neurons, depending upon inoculum titer and other conditions<sup>18</sup>. In mice infected with HSV-1 strain KOS, the average number of TG neurons in which LAT was detected by *in situ* hybridization (LAT+ cells) is ~500<sup>17</sup>. For the purpose of estimating HSV-1 miRNAs per latently infected cell, we therefore divided molecules per ganglion by 500 LAT+ neurons, which could be as much as a 10-fold underestimate of latently infected neurons. This calculation was not applied to cellular miRNA let-7a, which is simply the number obtained in panel **A**.
